# Supplementary material
Source: MDPI journal article supplement (https://www.mdpi.com/2227-9717/11/8/2324)
Supplement: s1 [file s1]

**Table S1.** Application of AI in GC detection.

| No. | First Author            | Data Sources  | Sample Size | Verification Mode | Classification Algorithms | C-index or AUC |
|-----|-------------------------|---------------|-------------|-------------------|---------------------------|----------------|
| 1   | Lida, M (2018)[13]      | Japan         | 5648        | EV                | Cox                       | 0.76           |
| 2   | Zhi, SL (2022)[14]      | TCGA          | 318         | IV                | Cox                       | 0.798          |
| 3   | Xu, W (2021)[15]        | China         | 428         | EV                | LR                        | 0.82           |
| 4   | Zhang, XR (2022)[16]    | China         | 2779        | IV                | Cox                       | 0.82           |
| 5   | Jin, Y (2021)[17]       | China         | 417         | IV                | Cox                       | 0.753          |
| 6   | Yang, Y (2021)[18]      | China         | 392         | IV                | LR                        | 0.924          |
| 7   | Duan, FJ (2021)[19]     | China         | 1088        | IV                | LR                        | 0.773          |
| 8   | Ishikura, N (2021)[20]  | Japan         | 3678        | EV                | LR                        | 0.78           |
| 9   | Charvat, H (2016)[21]   | Japan         | 19028       | IV                | Cox                       | 0.768          |
| 10  | Wang, H (2019)[22]      | TCGA+GEO      | 1087        | EV                | Cox                       | NS             |
| 11  | Wang, XY (2022)[23]     | GenBank       | 1022        | IV                | RF                        | 0.75           |
| 12  | Sun, MY (2020)[24]      | TCGA          | 919         | IV                | Cox                       | 0.781          |
| 13  | Briggs, E(2022)[25]     | Britain       | 40348       | IV                | SVM+RF+LR+NB+XGB          | 0.87           |
| 14  | Cao, MM (2020)[26]      | China         | 89914       | IV                | Cox                       | NS             |
| 15  | Park, B (2021)[27]      | South Korea   | 1586        | IV                | LR                        | 0.607          |
| 16  | In, H (2018)[28]        | United States | 140         | IV                | LR                        | NS             |
| 17  | Mahmoodi, SA (2020)[29] | Iran          | 560         | IV                | FCM+ANN+SV M+DT           | NS             |
| 18  | Zhang, LW (2020)[30]    | China         | 640         | EV                | DL(CNN)                   | 0.78           |
| 19  | Kumar, S (2015)[31]     | NS            | 210         | IV                | NS                        | 0.87           |
| 20  | Yang, JC (2018)[32]     | TCGA+GEO      | 684         | EV                | Cox                       | 0.809          |
| 21  | Li, TD (2020)[33]       | TCGA          | 406         | IV                | Cox                       | 0.92           |
| 22  | Xie, SH (2016)[34]      | Sweden        | 1009        | IV                | LR                        | 0.84           |
| 23  | Hou, C (2022)[35]       | China         | 2909        | EV                | Cox                       | 0.728          |
| 24  | Zhang, LX (2022)[36]    | China         | 3647        | IV                | Cox                       | 0.685          |
| 25  | Liu, QF (2021)[37]      | China         | 10018       | EV                | RF                        | 0.852          |
| 26  | Haga, Y (2018)[38]      | Japan         | 2045        | IV                | Cox                       | 0.80           |
| 27  | Gao, L (2021)[39]       | TCGA          | 350         | IV                | Cox                       | 0.713          |
| 28  | Yang, Y (2022)[40]      | TCGA+GEO      | 64267       | EV                | Cox                       | 0.611          |
| 29  | Lee, TY (2015)[41]      | China         | 278898      | IV                | Cox                       | 0.78           |
| 30  | Liu, YF (2020)[42]      | TCGA+GEO      | 1114        | EV                | Cox                       | 0.782          |
| 31  | Bai, F (2020)[43]       | China         | 1016        | IV                | LR                        | NS             |
| 32  | Wang, P (2018)[44]      | China         | 290         | IV                | LR                        | 0.731          |
| 33  | Wang, XD (2021)[45]     | China         | 1164        | EV                | DL                        | 0.990          |
| 34  | D'Journo, XB (2021)[46] | IESG          | 8403        | IV                | LR                        | 0.64           |
| 35  | Zhu, M (2022)[47]       | Britain       | 420964      | IV                | Cox                       | NS             |
| 36  | Wang, J (2022)[48]      | TCGA          | 1000        | IV                | Cox                       | 0.86           |
| 37  | Chen, XW (2020)[49]     | GEO           | 475         | IV                | Cox                       | NS             |
| 38  | Zheng, H (2021)[50]     | TCGA+GEO      | 431         | IV                | Cox                       | 0.785          |
| 39  | Lin, ZK (2022)[51]      | SEER          | 18752       | IV                | LR                        | 0.703          |

|    |                                 |                              |       |    |                     |           |
|----|---------------------------------|------------------------------|-------|----|---------------------|-----------|
| 40 | Praud, D (2016)[52]             | SNIIRAM+P<br>MSI             | 36435 | IV | RE                  | NS        |
| 41 | Pietrantonio, F<br>(2019)[53]   | Several<br>countries         | 1556  | IV | Cox                 | NS        |
| 42 | Huang, S (2021)[54]             | China                        | 400   | EV | LR+RF               | 0.83      |
| 43 | Png, CW (2022)[55]              | China                        | 89    | IV | LR                  | 0.82      |
| 44 | van den Boorn, HG<br>(2019)[56] | Holland                      | 4763  | IV | Cox                 | 0.68      |
| 45 | Jiang, F (2022)[57]             | TCGA+GEO                     | 未说明   | EV | Cox                 | 0.655     |
| 46 | Lei, L (2022)[58]               | TCGA                         | 407   | IV | Cox                 | 0.8790    |
| 47 | Chen, T (2019)[59]              | TCGA                         | 134   | IV | SVM                 | 0.950     |
| 48 | Guan, KL (2020)[60]             | TCGA+GEO+<br>HPA             | 486   | IV | Cox                 | 0.52~0.73 |
| 49 | Cui, YF (2022)[61]              | China                        | 719   | IV | DL                  | 0.829     |
| 50 | Lee, IS (2021)[62]              | GEO+ South<br>Korea          | 675   | EV | RF+LR+Cox           | 0.85      |
| 51 | Sohn, BH (2017)[63]             | TCGA+ South<br>Korea         | 961   | EV | DT+Cox              | NS        |
| 52 | Cai, WY (2020)[64]              | TCGA+ACRG<br>+GEO            | 2533  | EV | Cox                 | 0.754     |
| 53 | Bai, Y (2020)[65]               | TCGA                         | 373   | EV | LR+Cox              | 0.79      |
| 54 | Wang, YN (2022)[66]             | China                        | 284   | IV | DL(GNN)             | 0.76~0.82 |
| 55 | Zhang, C (2021)[67]             | GEO                          | 300   | IV | Cox                 | 0.676     |
| 56 | Xue, SM (2022)[68]              | TCGA+GEO+<br>China           | 347   | EV | Cox                 | 0.702     |
| 57 | Zhou, LQ (2021)[69]             | GEO+GTEx+<br>TCGA            | 407   | EV | Cox                 | 0.614     |
| 58 | Chen, J (2022)[70]              | TCGA+GEO                     | 334   | EV | Cox                 | 0.662     |
| 59 | Feng, B (2021)[71]              | MDSP+ China                  | 2168  | EV | DL(TL)+LR           | 0.921     |
| 60 | Wang, S (2021)[72]              | China                        | 7945  | IV | LR                  | 0.615     |
| 61 | Li, J (2021)[73]                | TCGA+GEO+<br>HADb+MSig<br>DB | 714   | EV | Cox                 | 0.64      |
| 62 | Zhang, YH (2018)[74]            | GEO+ArrayEx<br>press+TCGA    | 654   | EV | Cox                 | NS        |
| 63 | Qiu, LX (2020)[75]              | China                        | 2287  | IV | LR+DT               | 0.684     |
| 64 | Gao, B (2021)[76]               | TCGA                         | 350   | EV | Cox                 | 0.701     |
| 65 | Luo, D (2021)[77]               | TCGA+GEO                     | 660   | EV | Cox                 | 0.912     |
| 66 | Han, ZX (2022)[78]              | China                        | 183   | IV | DL(CNN)+SV<br>M+MLP | NS        |
| 67 | Jiang, YM (2018)[79]            | China<br>TCGA+               | 1591  | EV | Cox                 | 0.754     |
| 68 | Sun, ZP (2020)[80]              | miRTarBase+<br>miRDB+        | 329   | IV | Cox                 | 0.868     |

|    |                              |            |        |    |       |        |
|----|------------------------------|------------|--------|----|-------|--------|
|    |                              | TargetScan |        |    |       |        |
| 69 | Gu, C (2020)[81]             | China      | 335    | IV | Cox   | 0.935  |
| 70 | Zhu, X (2023)[82]            | CKB+China  | 435673 | EV | Cox   | 0.754  |
| 71 | Murphy, John D<br>(2023)[83] | China      | 546    | IV | Lasso | 0.7341 |

---

TCGA: The Cancer Genome Atlas. GEO: Gene Expression Omnibus. SEER: Surveillance, Epidemiology, and End Results Program. SNIIRAM: Système National d'Information Inter-Régimes de l'Assurance Maladie. PMSI: Programme de Médicalisation des Systèmes d'Information. HPA: Human Protein Atlas. ACRG: Asian Cancer Research Group. GNN: Graph Neural Network. GTEx: Genotype-Tissue Expression. MDSP: the Mars Data Science Platform (<https://www.marsbigdata.com/>). HADb: the Human Autophagy Database. MSigDB: Molecular Signatures Database. miRTarBase: The experimentally validated microRNA-target interactions database. miRDB: MicroRNA Target Prediction Database. TargetScan: ([targetscan.org/](https://targetscan.org/)). CKB: China Kadoorie Biobank. LR: Logistics Regression. RF: Random Forests. SVM: Support Vector Machine. NB: Naïve bayes. XGB: eXtreme Gradient Boosting. FCM: Fuzzy Cognitive Map. ANN: Artifical Neural Network. DT: Decision Tree. CNN: Convolutional Neural Networks. NS: Not stated. DL: Deep Learning. RE: Random Effects. GNN: Graph Neural Networks. TL: Transfer Learning. MLP: Multilayer Perceptron. IV: Internal verification. EV: External verification.
